# Supplementary material for: Efficient purification of single-walled carbon nanotube fibers by instantaneous current injection and acid washing
Source: Royal Society of Chemistry journal article supplement (doi:10.1039/c6ra20967j), 2016-01-01
Supplement: c6ra20967j1.pdf [file c6ra20967j1.pdf]

# Efficient Purification of Single-Walled Carbon Nanotube Fibers by Instantaneous Current Injection and Acid Washing

Shuhui Li,<sup>1</sup> Yuanyuan Shang,<sup>1\*</sup> Weiqi Zhao,<sup>2</sup> Chunfei Hua,<sup>1</sup> Ying Wang,<sup>1</sup> Xinjian Li,<sup>1</sup> Anyuan Cao<sup>2\*</sup>

<sup>1</sup> School of Physical Engineering, Zhengzhou University, Zhengzhou, Henan 450052, China

<sup>2</sup> Department of Materials Science and Engineering, College of Engineering, Peking University, Beijing 100871, P. R. China

## Supporting Information

**Figure S1.** SEM images of the inside of a purified SWNT fiber.

**Figure S2.** TGA curves of as-spun fibers, purified samples carried out in air and in N<sub>2</sub> up to 1000 °C.

**Figure S3.** SEM characterization on the wrinkled morphology of purified SWNT fibers.

**Figure S4.** SEM images of a pristine fiber and purified fiber using only acid/H<sub>2</sub>O<sub>2</sub> treatment (without current injection) as control sample.

**Figure S5.** Stress–strain curves of the purified fibers with different gauge lengths of 10 mm and 40 mm, respectively.

**Figure S6.** SEM images of fracture surface of the purified SWNT fibers.

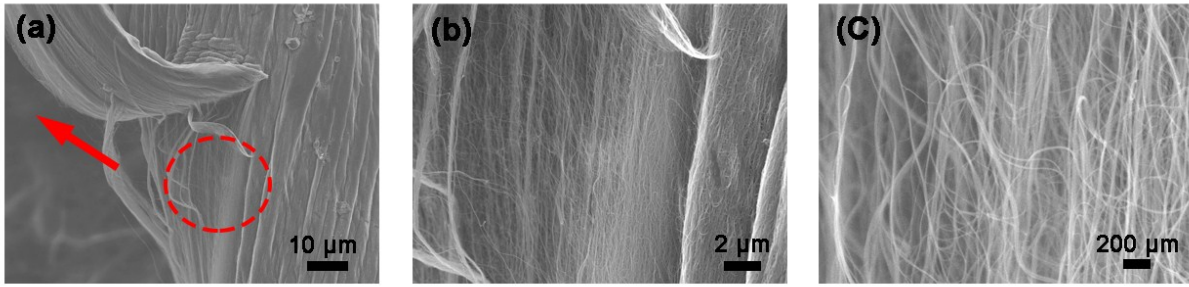

**Figure S1.** SEM images of the inside of a purified SWNT fiber. The surface part has been lifted up so that the internal region can be examined. There are no traces of residual catalyst particles inside the fiber.

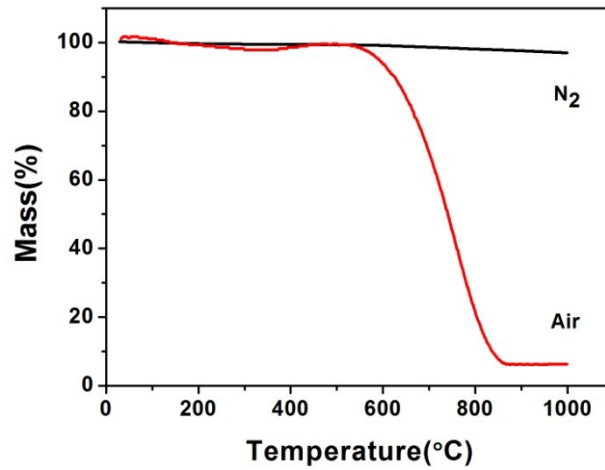

**Figure S2.** TGA curves of purified CNT fibers carried out in air and in N<sub>2</sub> up to 1000°C, respectively.

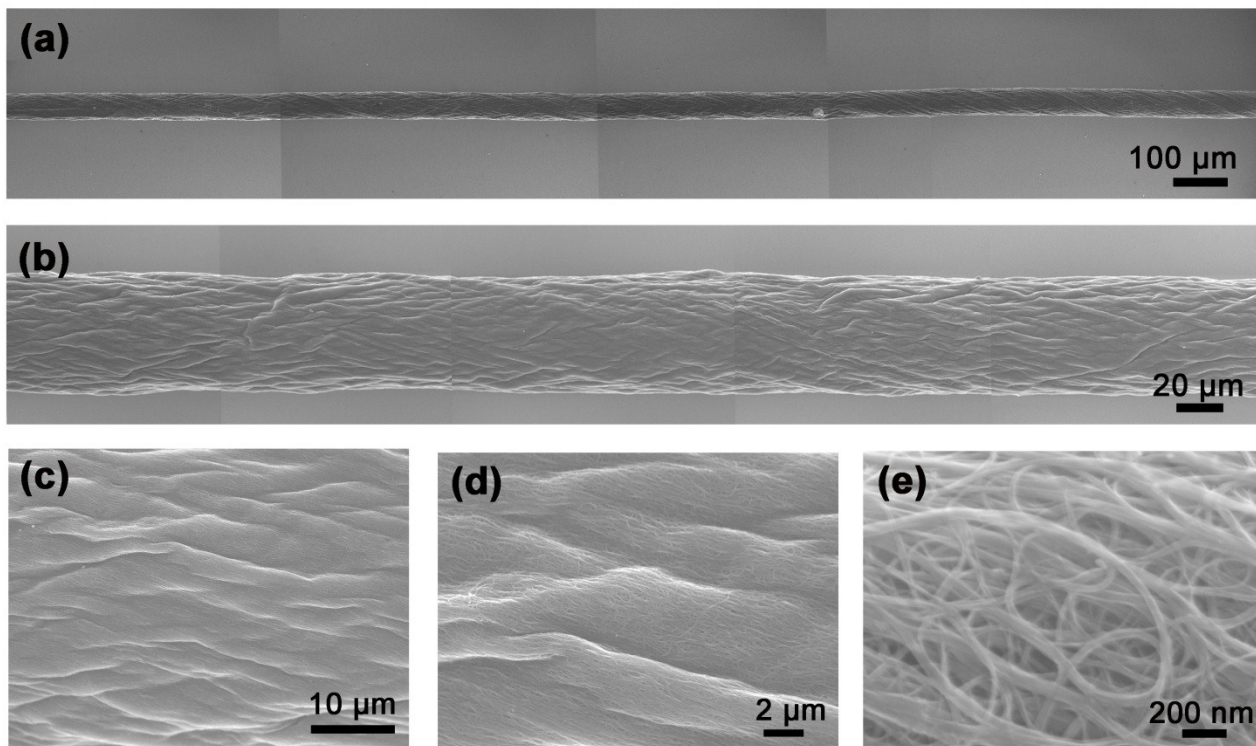

**Figure S3.** SEM characterization on the wrinkled morphology of purified SWNT fibers. (a)-(e) SEM images of a purified fiber from low to high-magnification views.

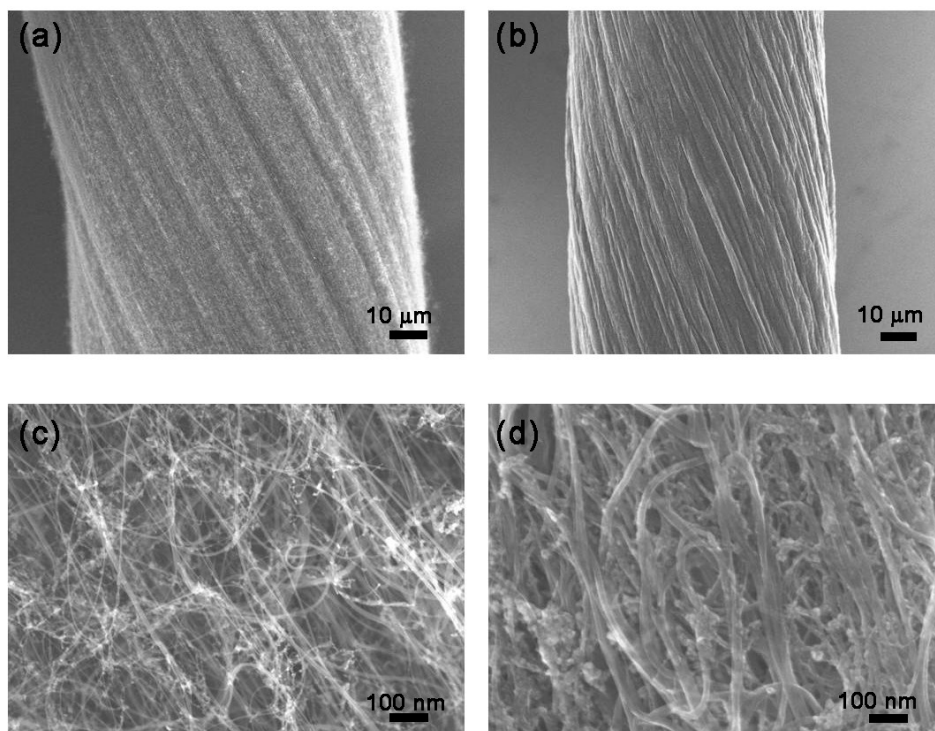

**Figure S4.** (a) and (c) SEM images of a pristine fiber. (b) and (d) SEM images of a purified fiber using only acid/H<sub>2</sub>O<sub>2</sub> treatment (without current injection) as control sample. Without current injection, there remain a significant amount of impurities trapped within the fiber.

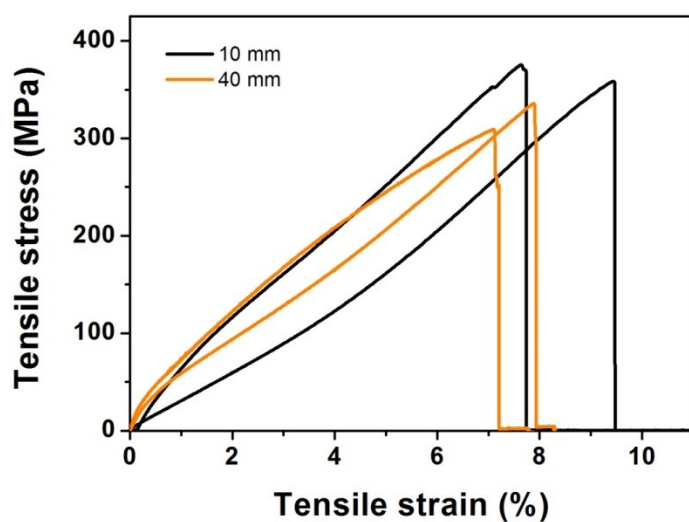

**Figure S5.** Stress–strain curves of the purified fibers with different gauge lengths of 10 mm and 40 mm, respectively.

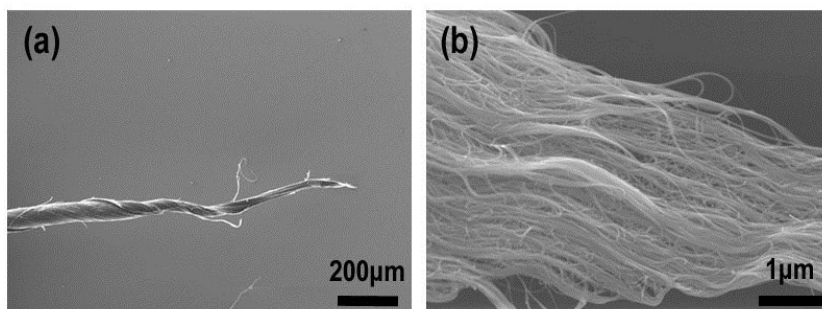

**Figure S6.** SEM images of the fractured surface of the purified SWNT fibers. (a) Low-magnification SEM image of the fractured surface in a SWNT fiber after tensile testing. (b) High-magnification view of the fractured surface.
